# Supplementary material for: A Model for a Standardized and Sustainable Pediatric Anesthesia-Intensive Care Unit Hand-Off Process
Source: MDPI journal article supplement (doi:10.3390/children7090123), 2020-09-03
Supplement: s1 [file s1]

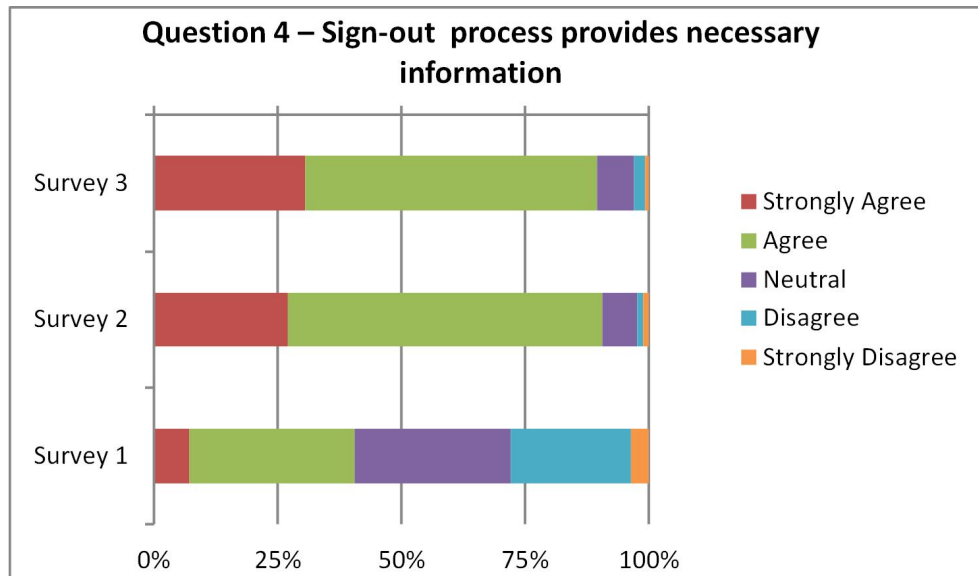

**Figure S1:** Distribution of responses for Survey Question 4—the time out for sign out process provides the necessary information about the patient.

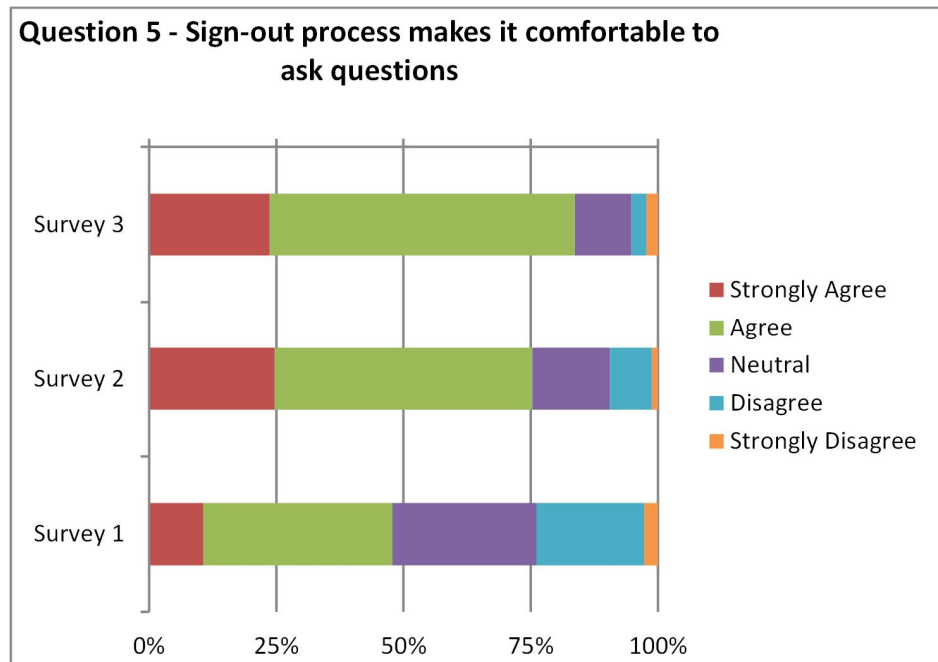

**Figure S2.** Distribution of responses for Survey Question 5—the sign out system makes it comfortable for you to ask question to the OR/ICU team members.

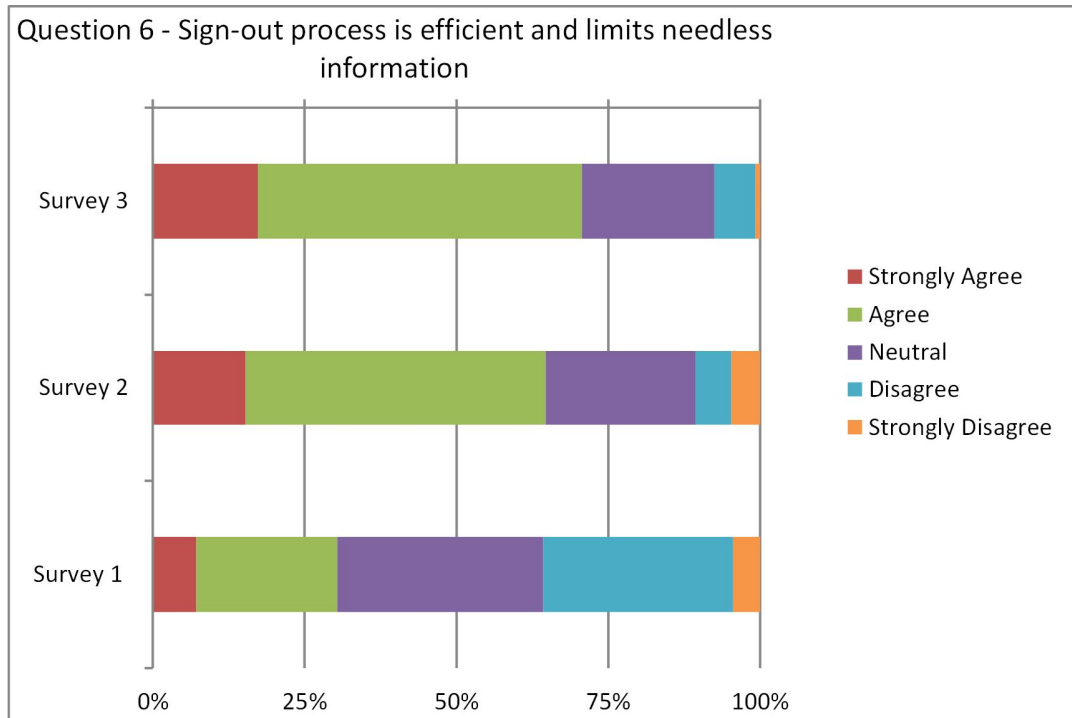

**Figure S3.** Distribution of responses for Survey Question 6—the sign out system is efficient and limits needless information about patient care.

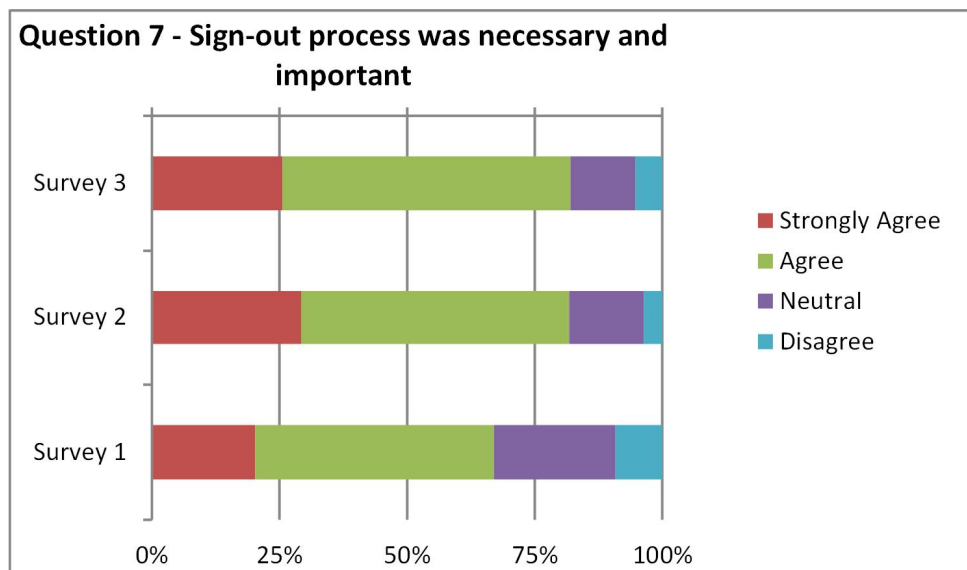

**Figure S4.** Distribution of responses for Survey Question 7—at the end of the time out for sign out, do you feel like the sign out was a necessary and important part of patient care.

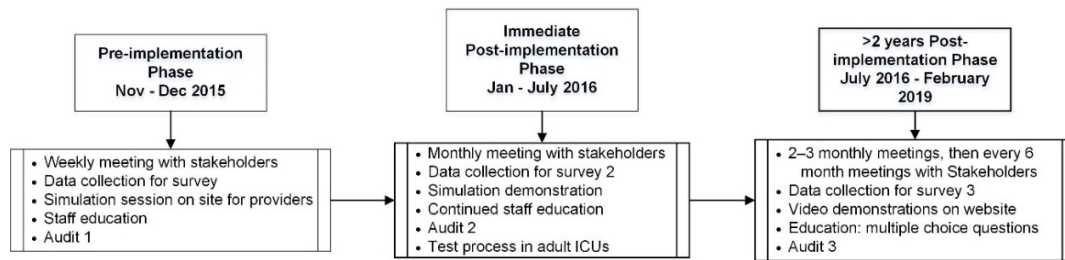

**Figure S5.** Timelines for the Quality Improvement (QI).
